# Supplementary material for: Disparities in Under-Five Child Injury Mortality between Developing and Developed Countries: 1990–2013
Source: PubMed Central journal article supplement (PMC4962194; doi:10.3390/ijerph13070653), 2016-07-07
Supplement: ijerph-13-00653-s001.pdf [file ijerph-13-00653-s001.pdf]

# Supplementary Materials: Disparities in Under-Five Child Injury Mortality between Developing and Developed Countries: 1990–2013

Yun Huang, Yue Wu, David C. Schwebel, Liang Zhou and Guoqing Hu

**Table S1.** Child injury mortality in developing countries by nation (<1 year, 1990 vs. 2013).

| Country                        | 1990 | 2013  | % Change in Rates |
|--------------------------------|------|-------|-------------------|
| Seychelles                     | 15.5 | 18.5  | 19                |
| Taiwan                         | 26.6 | 29.3  | 10                |
| Costa Rica                     | 28.2 | 20.6  | -27               |
| Syria                          | 30.0 | 461.9 | 1440              |
| Solomon Islands                | 30.7 | 29.2  | -5                |
| Vanuatu                        | 31.3 | 49.8  | 59                |
| United Arab Emirates           | 33.5 | 10.6  | -68               |
| Egypt                          | 33.5 | 32.3  | -4                |
| Malaysia                       | 34.6 | 24.6  | -29               |
| Bahrain                        | 37.4 | 16.0  | -57               |
| Mauritius                      | 38.7 | 50.9  | 32                |
| Cuba                           | 41.9 | 21.6  | -48               |
| Fiji                           | 42.9 | 65.0  | 52                |
| Antigua and Barbuda            | 47.6 | 49.5  | 4                 |
| Samoa                          | 47.7 | 22.9  | -52               |
| Kuwait                         | 49.8 | 19.6  | -61               |
| Qatar                          | 51.0 | 36.8  | -28               |
| Thailand                       | 52.5 | 24.6  | -53               |
| Mauritania                     | 53.0 | 64.1  | 21                |
| Libya                          | 53.8 | 31.0  | -42               |
| Philippines                    | 56.0 | 45.6  | -19               |
| Saudi Arabia                   | 57.9 | 9.4   | -84               |
| Jamaica                        | 58.8 | 54.8  | -7                |
| The Bahamas                    | 59.3 | 34.9  | -41               |
| Honduras                       | 60.5 | 51.2  | -15               |
| Trinidad and Tobago            | 62.9 | 66.6  | 6                 |
| Georgia                        | 64.0 | 37.4  | -42               |
| Panama                         | 64.0 | 56.9  | -11               |
| Federated States of Micronesia | 65.6 | 25.8  | -61               |
| Grenada                        | 67.7 | 42.2  | -38               |
| Sao Tome and Principe          | 67.8 | 55.6  | -18               |
| Paraguay                       | 68.5 | 56.0  | -18               |
| Chile                          | 70.5 | 21.0  | -70               |
| Kiribati                       | 71.3 | 100.5 | 41                |
| Namibia                        | 72.0 | 47.6  | -34               |
| Papua New Guinea               | 73.2 | 88.5  | 21                |
| Eritrea                        | 73.3 | 52.0  | -29               |
| Barbados                       | 75.1 | 56.0  | -25               |
| Kazakhstan                     | 80.8 | 47.9  | -41               |
| Jordan                         | 82.5 | 38.0  | -54               |
| Uruguay                        | 83.2 | 67.5  | -19               |
| Saint Lucia                    | 83.2 | 57.7  | -31               |

Table S1. Cont.

| Country                          | 1990  | 2013  | % Change in Rates |
|----------------------------------|-------|-------|-------------------|
| Myanmar                          | 83.4  | 43.5  | -48               |
| Senegal                          | 83.5  | 53.6  | -36               |
| Marshall Islands                 | 87.2  | 69.9  | -20               |
| Nicaragua                        | 87.5  | 68.7  | -22               |
| Togo                             | 88.5  | 67.9  | -23               |
| Azerbaijan                       | 89.8  | 45.3  | -50               |
| Saint Vincent and the Grenadines | 91.5  | 83.7  | -9                |
| Venezuela                        | 93.1  | 57.3  | -39               |
| South Africa                     | 94.6  | 72.6  | -23               |
| Ghana                            | 96.7  | 84.3  | -13               |
| Turkey                           | 97.0  | 27.6  | -72               |
| Sri Lanka                        | 97.8  | 14.5  | -85               |
| Dominican Republic               | 97.9  | 97.4  | 0                 |
| Lesotho                          | 101.9 | 138.1 | 36                |
| Laos                             | 103.0 | 97.3  | -6                |
| Cambodia                         | 104.3 | 78.7  | -24               |
| Sudan                            | 104.4 | 44.6  | -57               |
| Botswana                         | 105.0 | 73.3  | -30               |
| Guatemala                        | 107.4 | 67.4  | -37               |
| Madagascar                       | 107.8 | 52.3  | -52               |
| Tajikistan                       | 108.0 | 61.9  | -43               |
| Cape Verde                       | 108.7 | 71.1  | -35               |
| Turkmenistan                     | 109.1 | 78.2  | -28               |
| Armenia                          | 111.6 | 25.7  | -77               |
| Niger                            | 112.5 | 63.1  | -44               |
| Mexico                           | 113.1 | 58.2  | -49               |
| Zimbabwe                         | 113.6 | 69.9  | -39               |
| Timor-Leste                      | 113.7 | 68.0  | -40               |
| Cameroon                         | 114.0 | 129.4 | 14                |
| Tonga                            | 115.0 | 110.9 | -4                |
| Swaziland                        | 115.2 | 152.3 | 32                |
| The Gambia                       | 115.9 | 71.8  | -38               |
| Yemen                            | 119.0 | 83.7  | -30               |
| Congo                            | 119.6 | 110.5 | -8                |
| Guinea-Bissau                    | 120.1 | 105.7 | -12               |
| Tunisia                          | 121.5 | 34.7  | -71               |
| Belize                           | 121.5 | 64.3  | -47               |
| Uzbekistan                       | 122.9 | 100.4 | -18               |
| Ecuador                          | 125.1 | 104.8 | -16               |
| Kenya                            | 125.4 | 99.3  | -21               |
| Vietnam                          | 125.6 | 40.6  | -68               |
| Mali                             | 125.9 | 87.0  | -31               |
| Benin                            | 127.2 | 58.8  | -54               |
| El Salvador                      | 128.4 | 29.0  | -77               |
| Zambia                           | 131.7 | 90.5  | -31               |
| Cote d'Ivoire                    | 131.8 | 116.2 | -12               |
| Guinea                           | 137.0 | 95.3  | -30               |
| Iraq                             | 137.8 | 71.2  | -48               |
| Brazil                           | 139.5 | 63.5  | -55               |
| Guyana                           | 139.9 | 174.9 | 25                |
| Suriname                         | 140.3 | 149.5 | 7                 |
| Argentina                        | 142.9 | 76.4  | -47               |
| Palestine                        | 147.1 | 50.4  | -66               |
| Central African Republic         | 148.4 | 154.5 | 4                 |

Table S1. Cont.

| Country                          | 1990   | 2013  | % Change in Rates |
|----------------------------------|--------|-------|-------------------|
| Dominica                         | 149.7  | 69.2  | -54               |
| Colombia                         | 151.1  | 76.4  | -49               |
| Gabon                            | 152.2  | 164.2 | 8                 |
| Nepal                            | 153.4  | 63.1  | -59               |
| Burundi                          | 154.6  | 115.3 | -25               |
| Algeria                          | 156.5  | 58.6  | -63               |
| Morocco                          | 156.9  | 75.3  | -52               |
| Democratic Republic of the Congo | 160.2  | 126.8 | -21               |
| Djibouti                         | 161.3  | 99.8  | -38               |
| Uganda                           | 163.8  | 149.0 | -9                |
| Tanzania                         | 164.5  | 156.3 | -5                |
| Haiti                            | 171.5  | 166.2 | -3                |
| Chad                             | 172.5  | 116.4 | -33               |
| Nigeria                          | 174.6  | 180.3 | 3                 |
| Malawi                           | 175.0  | 117.1 | -33               |
| Equatorial Guinea                | 175.1  | 331.2 | 89                |
| Afghanistan                      | 186.3  | 126.2 | -32               |
| Sierra Leone                     | 186.4  | 145.8 | -22               |
| Angola                           | 195.6  | 151.7 | -22               |
| Burkina Faso                     | 203.8  | 125.5 | -38               |
| Indonesia                        | 210.3  | 74.2  | -65               |
| Kyrgyzstan                       | 212.1  | 84.2  | -60               |
| Comoros                          | 216.1  | 96.8  | -55               |
| Bangladesh                       | 222.1  | 100.8 | -55               |
| Mongolia                         | 222.1  | 182.6 | -18               |
| Mozambique                       | 224.2  | 96.9  | -57               |
| Somalia                          | 227.8  | 97.3  | -57               |
| Pakistan                         | 234.0  | 230.3 | -2                |
| North Korea                      | 260.0  | 99.9  | -62               |
| India                            | 275.4  | 175.7 | -36               |
| Oman                             | 287.1  | 40.5  | -86               |
| Rwanda                           | 309.6  | 136.3 | -56               |
| China                            | 372.2  | 101.0 | -73               |
| Bhutan                           | 388.5  | 201.4 | -48               |
| Ethiopia                         | 388.9  | 99.7  | -74               |
| Iran                             | 412.3  | 50.7  | -88               |
| Peru                             | 424.3  | 162.3 | -62               |
| Maldives                         | 596.4  | 89.5  | -85               |
| Liberia                          | 602.7  | 96.1  | -84               |
| Lebanon                          | 638.0  | 33.9  | -95               |
| Bolivia                          | 1126.7 | 572.6 | -49               |

**Table S2.** Injury mortality in developing countries by nation (1–4 years, 1990 vs. 2013).

| Country                          | 1990 | 2013 | % Change in Rates |
|----------------------------------|------|------|-------------------|
| Vanuatu                          | 9.6  | 19.0 | 98                |
| Mauritius                        | 10.2 | 10.9 | 7                 |
| Solomon Islands                  | 10.3 | 9.8  | -6                |
| Barbados                         | 12.2 | 9.4  | -23               |
| Samoa                            | 13.1 | 7.8  | -41               |
| Antigua and Barbuda              | 13.4 | 13.9 | 4                 |
| Seychelles                       | 16.0 | 13.4 | -16               |
| Malaysia                         | 16.5 | 9.5  | -43               |
| Uruguay                          | 16.6 | 8.5  | -49               |
| Fiji                             | 16.9 | 32.6 | 93                |
| Honduras                         | 17.0 | 16.1 | -5                |
| Syria                            | 17.2 | 51.9 | 203               |
| Trinidad and Tobago              | 17.4 | 19.2 | 10                |
| Cuba                             | 17.5 | 5.8  | -67               |
| Bahrain                          | 17.5 | 5.8  | -67               |
| Grenada                          | 18.6 | 12.2 | -34               |
| The Bahamas                      | 19.8 | 11.6 | -41               |
| Paraguay                         | 19.9 | 19.3 | -3                |
| Costa Rica                       | 20.1 | 10.7 | -47               |
| Egypt                            | 21.3 | 16.1 | -25               |
| Dominica                         | 21.6 | 20.8 | -4                |
| Taiwan                           | 22.3 | 17.9 | -20               |
| Saint Lucia                      | 22.7 | 16.1 | -29               |
| Kuwait                           | 23.4 | 11.3 | -52               |
| Jamaica                          | 23.6 | 24.3 | 3                 |
| Chile                            | 23.9 | 8.5  | -64               |
| Papua New Guinea                 | 24.5 | 23.6 | -3                |
| Federated States of Micronesia   | 25.5 | 11.6 | -55               |
| Thailand                         | 26.5 | 17.5 | -34               |
| United Arab Emirates             | 26.8 | 8.0  | -70               |
| Philippines                      | 27.5 | 25.9 | -6                |
| Saint Vincent and the Grenadines | 27.7 | 22.3 | -19               |
| Tonga                            | 27.9 | 34.6 | 24                |
| Argentina                        | 28.4 | 17.0 | -40               |
| Marshall Islands                 | 28.8 | 25.9 | -10               |
| Belize                           | 29.6 | 17.7 | -40               |
| Dominican Republic               | 30.8 | 24.4 | -21               |
| Sao Tome and Principe            | 31.7 | 13.5 | -58               |
| Venezuela                        | 32.0 | 17.7 | -45               |
| Mexico                           | 32.1 | 17.0 | -47               |
| Sri Lanka                        | 32.3 | 12.6 | -61               |
| Kiribati                         | 32.7 | 39.4 | 21                |
| Brazil                           | 33.3 | 12.1 | -64               |
| Guatemala                        | 33.5 | 23.7 | -29               |
| Qatar                            | 33.6 | 21.5 | -36               |
| El Salvador                      | 34.1 | 11.1 | -67               |
| Cape Verde                       | 34.4 | 21.2 | -39               |
| Panama                           | 35.4 | 28.8 | -19               |
| Lesotho                          | 37.4 | 46.8 | 25                |
| Guyana                           | 38.4 | 40.7 | 6                 |
| Turkey                           | 38.9 | 10.7 | -72               |
| Botswana                         | 39.9 | 29.1 | -27               |
| Kenya                            | 39.9 | 26.8 | -33               |
| Zimbabwe                         | 39.9 | 36.7 | -8                |

Table S2. Cont.

| Country       | 1990  | 2013 | % Change in Rates |
|---------------|-------|------|-------------------|
| Libya         | 40.1  | 15.5 | -62               |
| Suriname      | 40.2  | 38.0 | -6                |
| Mauritania    | 41.4  | 38.8 | -6                |
| Nicaragua     | 41.6  | 16.4 | -61               |
| South Africa  | 44.1  | 27.3 | -38               |
| Palestine     | 45.9  | 21.1 | -54               |
| Georgia       | 46.8  | 25.8 | -45               |
| Azerbaijan    | 49.5  | 17.6 | -64               |
| Swaziland     | 50.4  | 61.0 | 21                |
| Namibia       | 53.7  | 28.2 | -47               |
| Ghana         | 54.4  | 41.1 | -24               |
| Cambodia      | 55.0  | 33.1 | -40               |
| Ecuador       | 57.4  | 45.0 | -21               |
| Iraq          | 57.8  | 29.6 | -49               |
| Colombia      | 59.0  | 34.3 | -42               |
| Myanmar       | 61.0  | 25.0 | -59               |
| Tanzania      | 62.3  | 43.9 | -30               |
| Kazakhstan    | 63.8  | 42.5 | -33               |
| Haiti         | 65.7  | 43.0 | -35               |
| Congo         | 66.4  | 51.7 | -22               |
| Pakistan      | 66.6  | 50.8 | -24               |
| Madagascar    | 66.8  | 19.2 | -71               |
| Lebanon       | 68.0  | 13.0 | -81               |
| Jordan        | 69.3  | 40.1 | -42               |
| Kyrgyzstan    | 70.5  | 27.9 | -60               |
| Morocco       | 70.6  | 28.7 | -59               |
| Comoros       | 74.2  | 16.3 | -78               |
| Algeria       | 74.4  | 27.4 | -63               |
| Eritrea       | 74.8  | 27.0 | -64               |
| Uzbekistan    | 75.0  | 52.8 | -30               |
| India         | 75.0  | 33.3 | -56               |
| Tunisia       | 75.6  | 22.6 | -70               |
| Sudan         | 76.9  | 32.9 | -57               |
| Tajikistan    | 77.4  | 37.0 | -52               |
| Armenia       | 77.6  | 15.5 | -80               |
| Cote d'Ivoire | 79.1  | 55.5 | -30               |
| The Gambia    | 79.3  | 33.0 | -58               |
| Peru          | 79.5  | 34.2 | -57               |
| Djibouti      | 82.2  | 31.9 | -61               |
| Nepal         | 83.6  | 24.8 | -70               |
| Timor-Leste   | 83.7  | 30.2 | -64               |
| Zambia        | 87.0  | 43.2 | -50               |
| Indonesia     | 87.2  | 26.8 | -69               |
| Gabon         | 89.9  | 76.5 | -15               |
| Yemen         | 90.3  | 35.0 | -61               |
| Saudi Arabia  | 91.5  | 20.3 | -78               |
| Mongolia      | 91.5  | 69.7 | -24               |
| Senegal       | 91.6  | 34.6 | -62               |
| Togo          | 95.4  | 47.9 | -50               |
| Cameroon      | 103.4 | 89.2 | -14               |
| Uganda        | 105.2 | 62.6 | -40               |
| Guinea-Bissau | 108.4 | 69.5 | -36               |
| Turkmenistan  | 110.5 | 54.6 | -51               |
| Vietnam       | 111.1 | 48.9 | -56               |

Table S2. Cont.

| Country                          | 1990  | 2013  | % Change in Rates |
|----------------------------------|-------|-------|-------------------|
| Laos                             | 111.1 | 66.0  | -41               |
| Chad                             | 114.1 | 102.2 | -10               |
| Benin                            | 115.7 | 27.1  | -77               |
| Oman                             | 116.8 | 20.5  | -82               |
| Burundi                          | 118.8 | 52.8  | -56               |
| Maldives                         | 130.0 | 24.6  | -81               |
| Sierra Leone                     | 130.8 | 68.8  | -47               |
| Guinea                           | 131.5 | 58.6  | -55               |
| North Korea                      | 131.6 | 43.5  | -67               |
| Mozambique                       | 134.6 | 32.1  | -76               |
| Somalia                          | 136.3 | 60.0  | -56               |
| Malawi                           | 144.3 | 65.0  | -55               |
| Central African Republic         | 144.3 | 135.6 | -6                |
| Burkina Faso                     | 147.4 | 66.7  | -55               |
| China                            | 152.1 | 39.3  | -74               |
| Mali                             | 160.5 | 79.8  | -50               |
| Ethiopia                         | 161.7 | 40.6  | -75               |
| Nigeria                          | 174.0 | 152.4 | -12               |
| Liberia                          | 174.4 | 26.8  | -85               |
| Rwanda                           | 174.7 | 49.9  | -71               |
| Democratic Republic of the Congo | 175.2 | 120.4 | -31               |
| Iran                             | 184.1 | 29.4  | -84               |
| Equatorial Guinea                | 188.8 | 189.3 | 0                 |
| Bhutan                           | 191.4 | 57.6  | -70               |
| Niger                            | 205.8 | 70.0  | -66               |
| Afghanistan                      | 210.1 | 131.3 | -38               |
| Angola                           | 278.8 | 143.5 | -49               |
| Bolivia                          | 316.5 | 99.8  | -68               |
| Bangladesh                       | 345.0 | 88.6  | -74               |

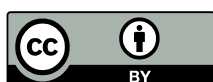

© 2016 by the authors; licensee MDPI, Basel, Switzerland. This article is an open access article distributed under the terms and conditions of the Creative Commons by Attribution (CC-BY) license (<http://creativecommons.org/licenses/by/4.0/>).
